# Supplementary material for: High-temperature synthesis of strong acidic ionic liquids functionalized, ordered and stable mesoporous polymers with excellent catalytic activities
Source: Royal Society of Chemistry journal article supplement (doi:10.1039/c2gc16562g), 2012-01-01

## **Electronic Supplementary Information**

### **High-temperature synthesis of strong acidic ionic liquids functionalized ordered and stable mesoporous polymers with excellent catalytic activities**

Fujian Liu, Shufeng Zuo, Weiping Kong and Chenze Qi\*

*Institute of Applied Chemistry, Shaoxing University, Shaoxing, 312000, People's Republic of China. Tel: +86-575-88345681; Fax: +86-575-88345681. E-mail address: qichenze@usx.edu.cn*

**Table S1.** The nomenclature of the catalysts synthesized under different conditions.

| Samples                                                     | Polymer network <sup>a</sup> | Cross-linker reagent <sup>b</sup> | Quaternary ammoniation of reagent <sup>c</sup>                                      | Treatment of acids <sup>d</sup>  |
|-------------------------------------------------------------|------------------------------|-----------------------------------|-------------------------------------------------------------------------------------|----------------------------------|
| OMR-[C <sub>3</sub> HMTA][SO <sub>3</sub> CF <sub>3</sub> ] | OMR                          | HMTA                              |  | HSO <sub>3</sub> CF <sub>3</sub> |
| OMR-[C <sub>3</sub> HMTA][SO <sub>4</sub> H]                | OMR                          | HMTA                              |  | H <sub>2</sub> SO <sub>4</sub>   |

<sup>a</sup> Stands for ordered and stable mesoporous phenol-formaldehyde resins.

<sup>b</sup> Stands for hexamethyltetramine cross-linker.

<sup>c</sup> Stands for quaternary ammoniation of reagents.

<sup>d</sup> Stands for the acids for ion exchange.

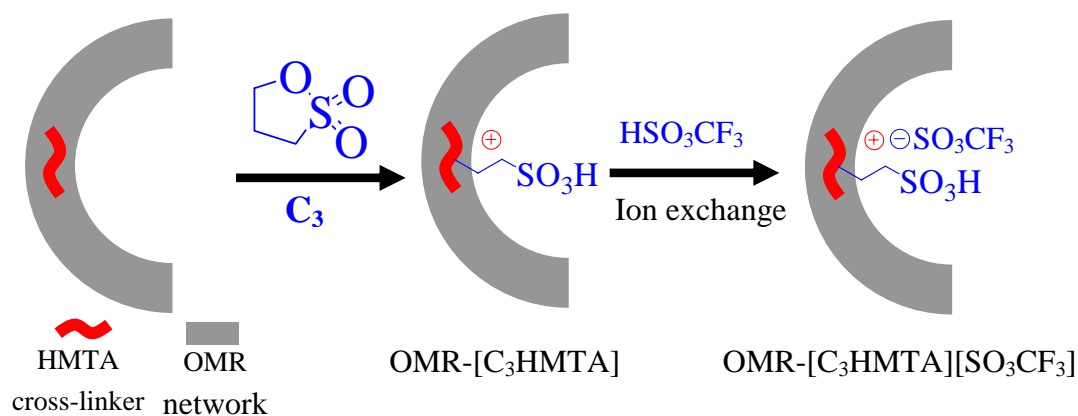

Supplement: c2gc16562g.pdf [file c2gc16562g.pdf]
